# Supplementary material for: FeOOH-activating resorcinol–formaldehyde resin nanospheres for the photo-Fenton degradation of organic pollutants
Source: Royal Society of Chemistry journal article supplement (doi:10.1039/d2nj03466b), 2022-01-01
Supplement: d2nj03466b1.pdf [file d2nj03466b1.pdf]

Electronic Supplementary Material (ESI) for New Journal of Chemistry.  
This journal is © The Royal Society of Chemistry 2022

## **FeOOH activating resorcinol-formaldehyde resin nanospheres for the photo-Fenton degradation of organic pollutants**

Binyao Liu,<sup>a</sup> Longgang Yan,<sup>c</sup> Jinyu Wen,<sup>a</sup> Xiaotian Liu,<sup>a</sup> Feng Duan,<sup>a</sup> Bi Jia,<sup>b</sup> Xiaoyan Liu,<sup>b</sup> Gaili Ke,<sup>a\*</sup> Huichao He,<sup>a, b\*</sup> and Yong Zhou<sup>d\*</sup>

*<sup>a</sup>State Key Laboratory of Environmental Friendly Energy Materials, School of Materials Science and Engineering, Southwest University of Science and Technology, Mianyang 621010, China.*

*<sup>b</sup>Institute of Environmental Energy Materials and Intelligent Devices, School of Metallurgy and Materials Engineering, Chongqing University of Science and Technology, Chongqing 401331, P. R. China.*

*<sup>c</sup>Institute of Applied Electronic, China Academy of Engineering Physics, Mianyang 621010, China.*

*<sup>d</sup>Ecomaterials and Renewable Energy Research Center, School of Physics, Nanjing University, Nanjing 211102, China.*

**Keywords:** Resorcinol-formaldehyde resin; FeOOH; Photo-Fenton; Hydrogen peroxide; Organic degradation

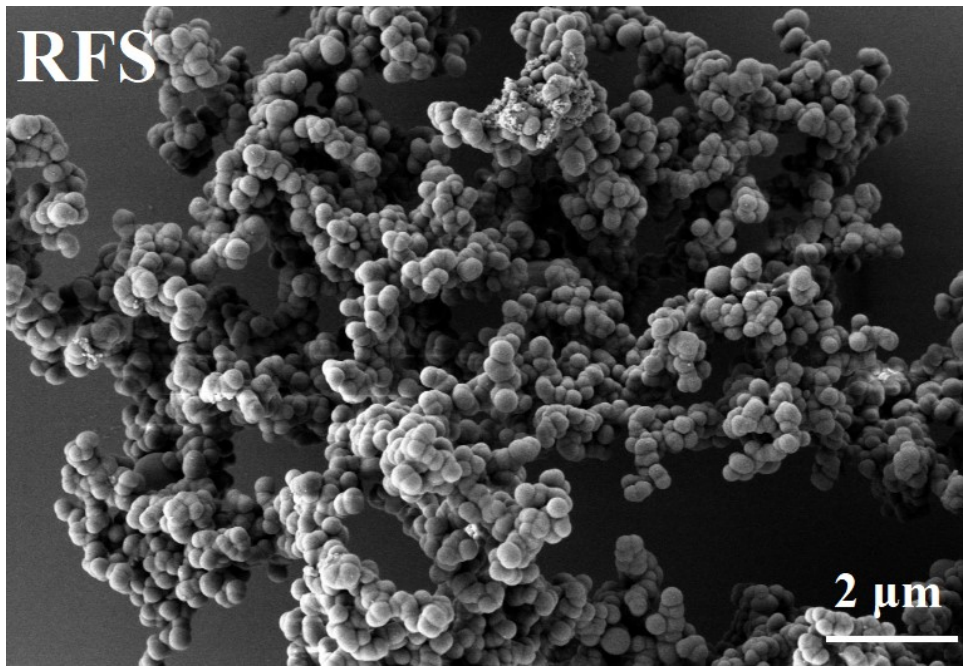

**Fig. S1** SEM image of the pristine RFS nanospheres.

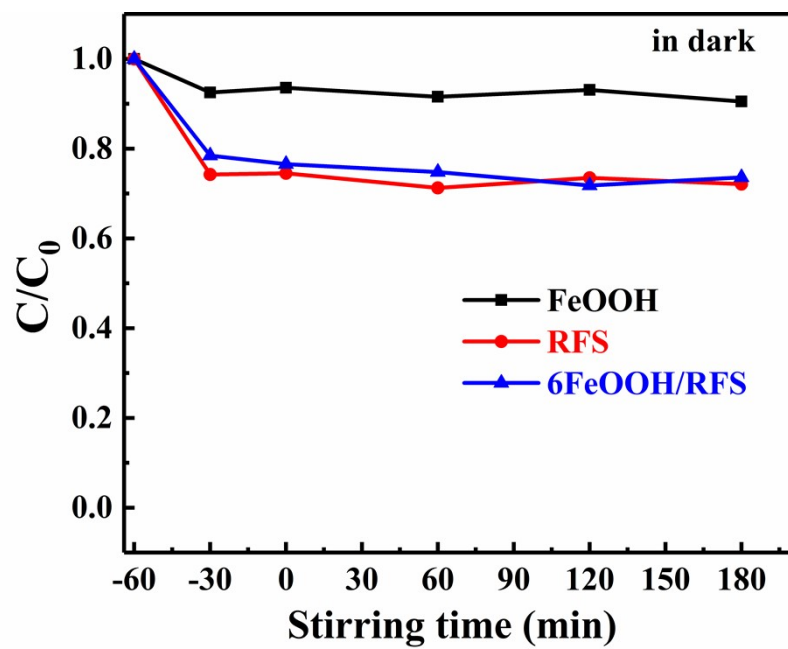

**Fig. S2** Degradation rate of RhB with different catalysts in dark condition. Experimental conditions:  $0.5 \text{ g L}^{-1}$  of photocatalysts, 15 ppm of RhB solution.

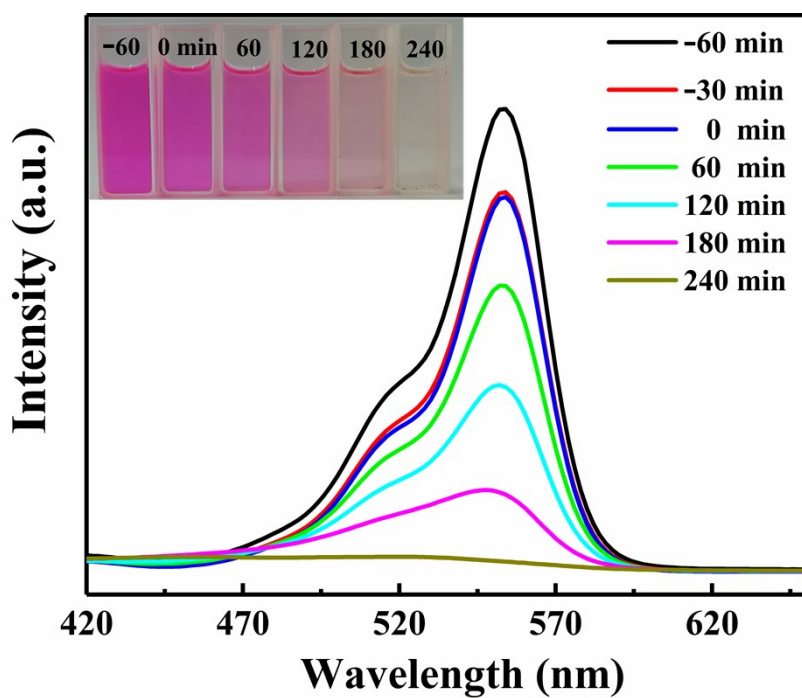

**Fig. S3** UV-vis absorbance spectral and photographs changes of RhB after different irradiation time with 6FeOOH/RFS composite. Experimental conditions: 0.5 g L<sup>-1</sup> of photocatalysts, 15 ppm of RhB solution, visible light irradiation ( $\lambda > 420$  nm).

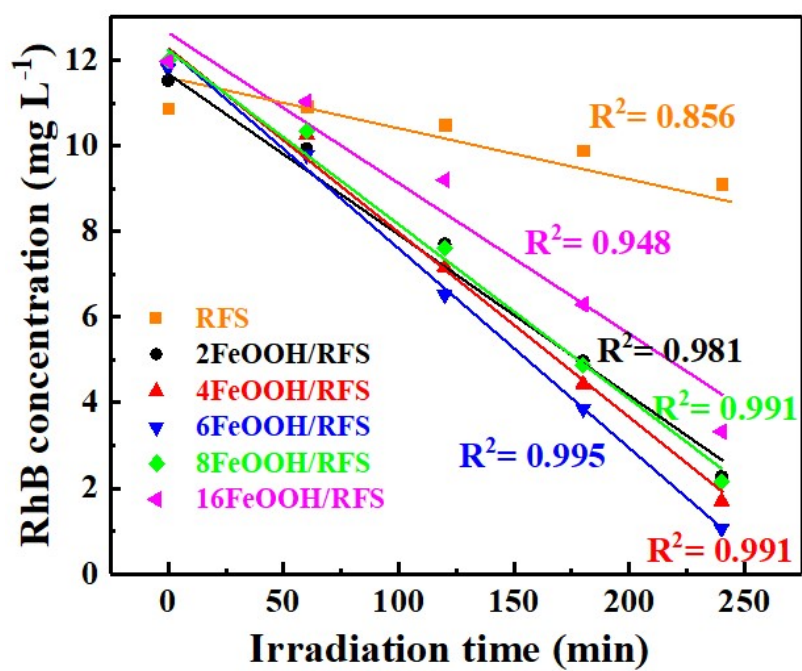

**Fig. S4** Zero-order kinetics curves of the degradation of RhB by different photocatalysts.

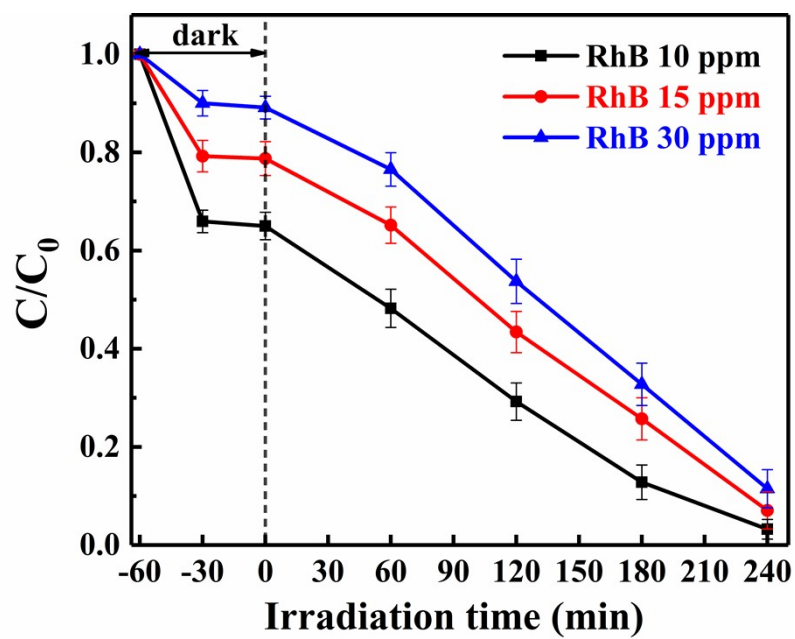

**Fig. S5** The degradation rate of RhB with different concentrations by 6FeOOH/RFS composite. Experimental conditions: 0.5 g L<sup>-1</sup> of photocatalysts, visible light irradiation ( $\lambda > 420$  nm).

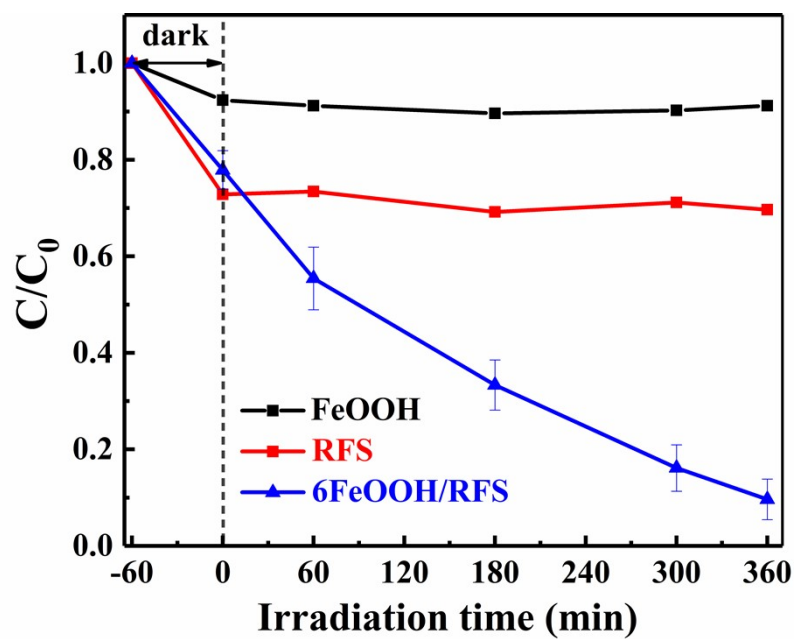

**Fig. S6** Degradation rate of DMP with different catalysts. Experimental conditions: 10 ppm of DMP solution, 1 g L<sup>-1</sup> of photocatalysts, visible light irradiation ( $\lambda > 420$  nm).

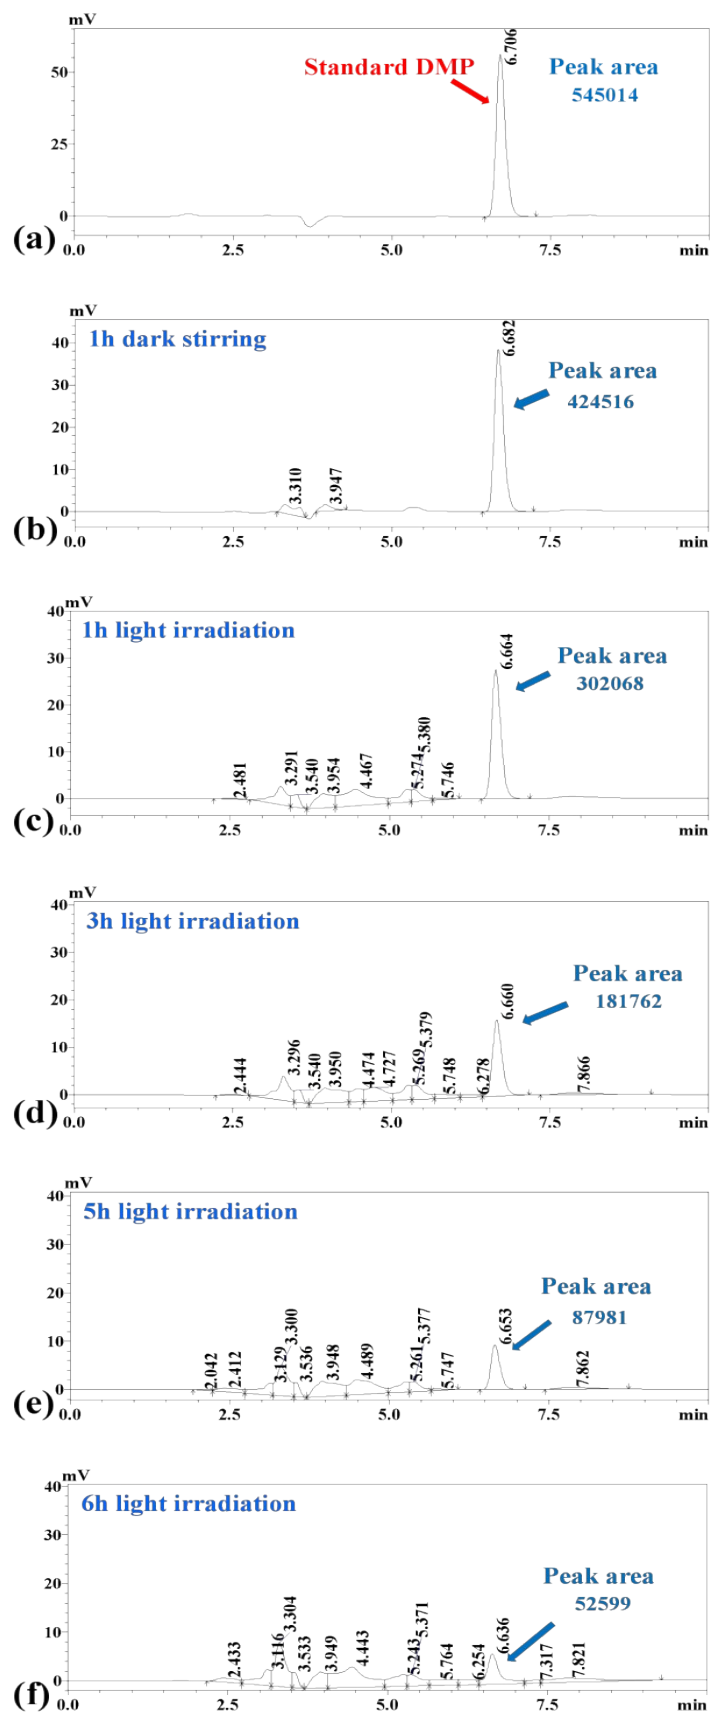

**Fig. S7** (a to f) The original HPLC data of **Fig. 4f** (HPLC chromatograms of the degradation of DMP by 6FeOOH/RFS composite after different reaction times).



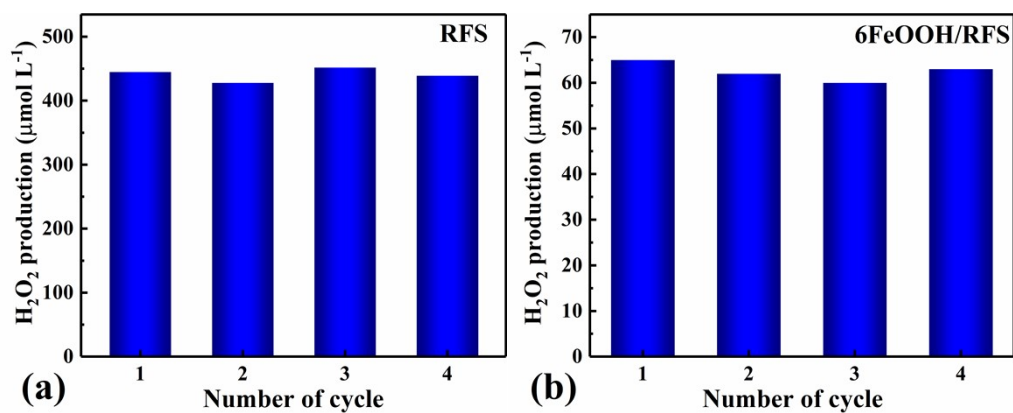

**Fig. S8** Photocatalytic production H<sub>2</sub>O<sub>2</sub> of the (a) RFS nanospheres and (b) 6FeOOH/RFS composite after four cycling runs. Experimental conditions: 20 mg of catalysts, 40 mL of H<sub>2</sub>O, visible light irradiation ( $\lambda > 420$  nm).

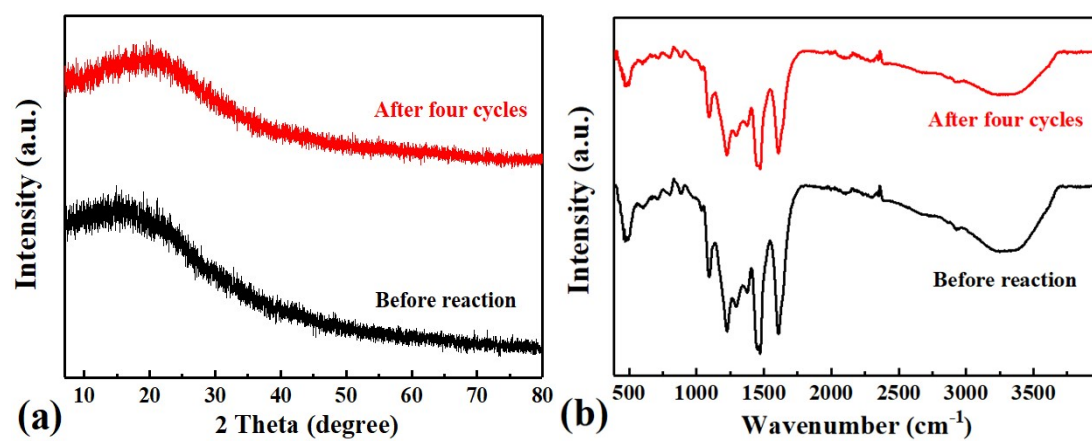

**Fig. S9** (a) XRD pattern and (b) FTIR spectrum of the 6FeOOH/RFS composite before and after four cycles of RhB degradation.

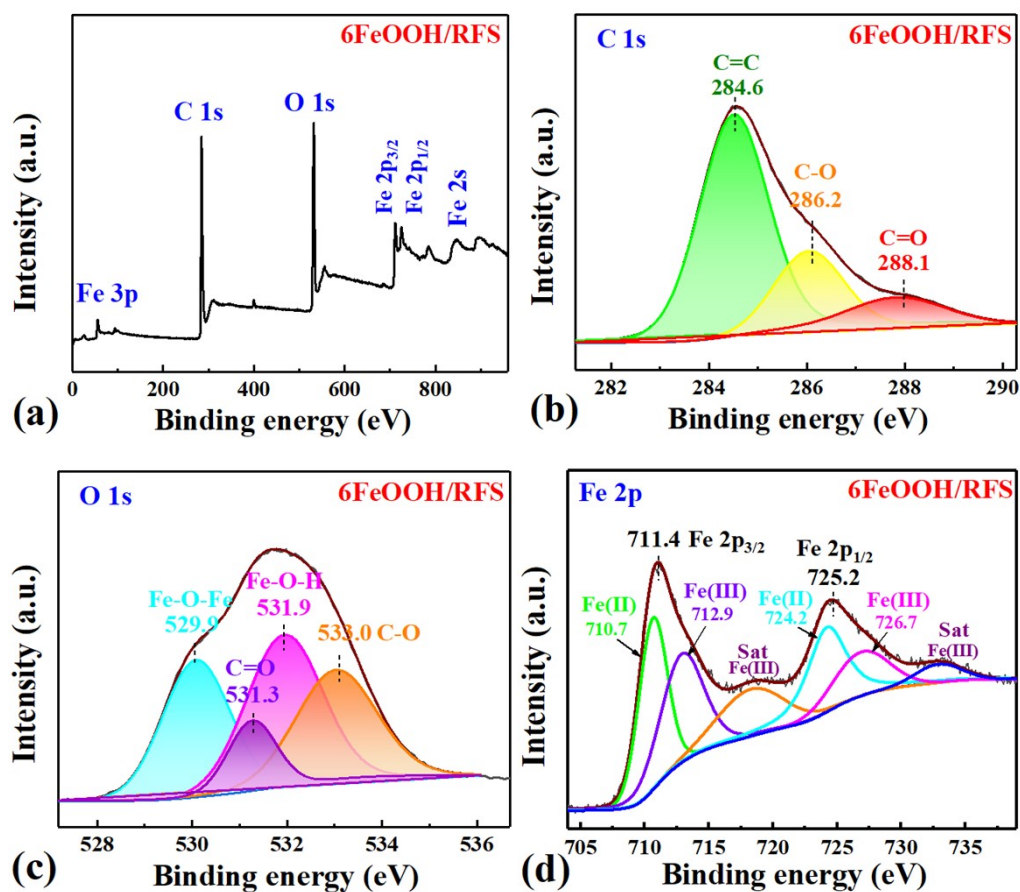

**Fig. S10** (a) Survey XPS spectrum, high resolution (b) C1s, (c) O1s and (d) Fe2p XPS spectra of 6FeOOH/RFS composite after four cycles of RhB degradation.

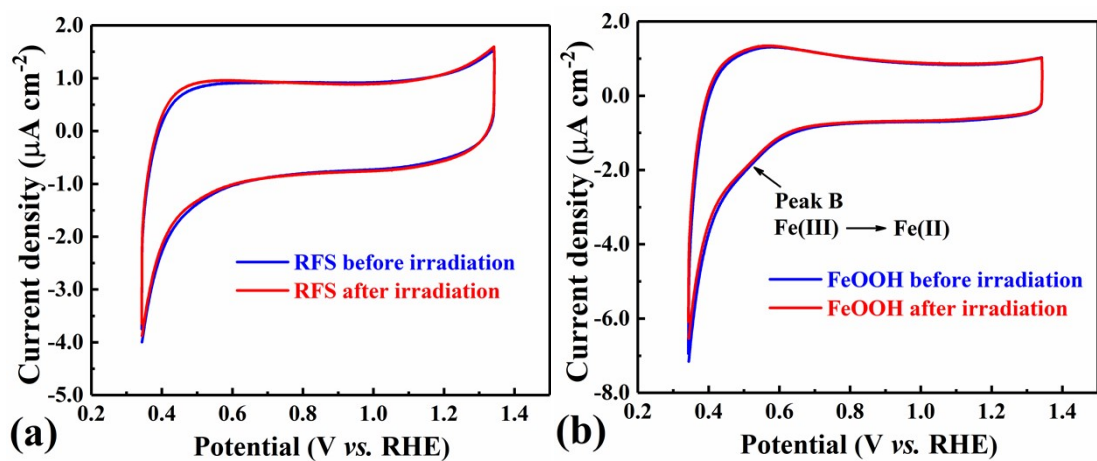

**Fig. S11** Cyclic voltammogram of (a) RFS and (b) FeOOH in 0.1 M  $\text{Na}_2\text{SO}_4$  solution (pH 6.8) before and after AM 1.5G irradiation

**Table S1.** The atomic ratios of the 6FeOOH/RFS composite before and after four cycles of RhB degradation according to the XPS detection

| <b>Samples</b>           | <b>C [<i>atom%</i>]</b> | <b>O [<i>atom%</i>]</b> | <b>Fe [<i>atom%</i>]</b> |
|--------------------------|-------------------------|-------------------------|--------------------------|
| <b>Before reaction</b>   | 62.68                   | 30.17                   | 7.15                     |
| <b>After four cycles</b> | 63.82                   | 29.74                   | 6.44                     |
